# Supplementary material for: Perturbation by Antimicrobial Bacteria of the Epidermal Bacterial Flora of Rainbow Trout in Flow-Through Aquaculture
Source: MDPI journal article supplement (doi:10.3390/biology11081249), 2022-08-22
Supplement: s1 [file s1]

# Perturbation by Antimicrobial Bacteria of the Epidermal Bacterial Flora of Rainbow Trout in Flow-through Aquaculture

Hajime Nakatani <sup>1</sup>, Naoki Yamada <sup>1</sup>, Naoki Hashimoto <sup>2</sup>, Fumiyoshi Okazaki <sup>2</sup>, Tomoko Arakawa <sup>1</sup>, Yutaka Tamaru <sup>2</sup> and Katsutoshi Hori <sup>1,\*</sup>

<sup>1</sup> Department of Biomolecular Engineering, Graduate School of Engineering, Nagoya University, Furo-cho, Chikusa, Nagoya 464-8603, Aichi, Japan; nakatanih@chembio.nagoya-u.ac.jp (H.N.); shifon0220@gmail.com (N.Y.); arakawa@lalaproduct.com (T.A.)

<sup>2</sup> Department of Life Sciences, Graduate School of Bioresources, Mie University, 1577 Kurimamachiya, Tsu 514-8507, Mie, Japan; pikachu-1125@yahoo.ne.jp (N.H.); okazaki@bio.mie-u.ac.jp (F.O.); ytamaru@bio.mie-u.ac.jp (Y.T.)

\* Correspondence: khori@chembio.nagoya-u.ac.jp; Tel.: +81-52-789-3339

## Supplementary tables

**Supplementary table S1.** Primers used in this study

| Name    | Sequence                                               | Description                                          | Reference |
|---------|--------------------------------------------------------|------------------------------------------------------|-----------|
| NGS63F  | TCGTCGGCAGCGTCAGATGTGTATAAGAGACAGCAGGCCTAACACATGCAAGTC | 16S rDNA V1-V2 primer for NGS                        | 37 *      |
| NGS338R | GTCTCGTGGGCTCGGAGATGTGTATAAGAGACAGGCTGCCTCCCGTAGGAGT   | 16S rDNA V1-V2 primer for NGS                        | 38 **     |
| 27F     | AGAGTTTGATYMTGGCTCAG                                   | 16S rDNA V1-V3 primer for identification of bacteria | 38 **     |
| 533R    | TTACCGCGGCKGCTGRCAC                                    | 16S rDNA V1-V3 primer for identification of bacteria | -         |

\*Marchesi et al. (1998) *Appl Environ Microbiol* 64: 795-799

\*\*M.T. Suzuki and S.J. Giovannoni. *Appl. Environ. Microbiol.*, 62 (1996), pp. 625-630

**Supplementary table S2.** Proportion of the skin mucus occupying bacteria in the river water.

| Year / month                        | 2019  |       |       | 2020  |       |       |       |       |       |       |       |
|-------------------------------------|-------|-------|-------|-------|-------|-------|-------|-------|-------|-------|-------|
|                                     | Oct.  | Nov.  | Dec.  | Jan.  | Feb.  | Mar.  | Apr.  | May.  | Jun.  | Aug.  | Nov.  |
| <i>Aeromonas sp.</i>                | 0.555 | 0.053 | 0.027 | 0.036 | 0.058 | 0.128 | 0.346 | 0.304 | 0.152 | 0.079 | 0.017 |
| <i>Acinetobacter sp.</i>            | 0.007 | 0.000 | 0.000 | 0.000 | 0.000 | 0.000 | 0.000 | 0.005 | 0.283 | 0.000 | 0.000 |
| <i>Flavobacterium psychrophilum</i> | 0.000 | 0.051 | 0.021 | 2.373 | 5.381 | 0.047 | 0.089 | 0.129 | 0.065 | 0.000 | 0.007 |
| <i>Pseudomonas sp.</i>              | 0.032 | 0.030 | 0.253 | 0.055 | 0.030 | 0.000 | 0.018 | 0.030 | 0.174 | 0.020 | 0.005 |
| <i>Vibrio sp.</i>                   | 0.000 | 0.000 | 0.000 | 0.228 | 0.363 | 0.599 | 0.496 | 0.172 | 0.196 | 0.020 | 0.000 |
| <i>Yersinia ruckeri</i>             | 0.120 | 0.059 | 0.883 | 0.145 | 0.222 | 0.296 | 0.319 | 0.109 | 0.022 | 0.009 | 0.002 |

Each value is expressed as % in the total reads.

Red and blue texts indicate highest and second highest values.

Pink cells indicate the month when the proportion of the species in the mucus was high.

**Supplementary table S3.** The antimicrobial bacteria isolated from the skin mucus of rainbow trout.

| Isolated Month/year<br>/place | Clone name   | Antimicrobial activity against bacteria |                           |                             |                                  | Identified bacterial species<br>(16S rDNA v1-v3) |
|-------------------------------|--------------|-----------------------------------------|---------------------------|-----------------------------|----------------------------------|--------------------------------------------------|
|                               |              | <i>Vibrio<br/>anguillarum</i>           | <i>Vibrio<br/>ordalli</i> | <i>Yersinia<br/>ruckeri</i> | <i>Aeromonas<br/>hydrophilla</i> |                                                  |
| Apr. 2019 Uren Aich<br>JP     | N5N1 (KHRT1) | ○                                       | ○                         | ○                           | ○                                | <i>Pseudomonas marginalis/rhodesiae</i>          |
|                               | N5N6         | ○                                       | ○                         |                             |                                  | <i>Pseudomonas marginalis/rhodesiae</i>          |
| Jun. 2019 Uren Aich<br>JP     | N6L1         | ○                                       | ○                         | ○                           | ○                                | <i>Pseudomonas koreensis</i>                     |
|                               | N6L2         | ○                                       |                           | ○                           | ○                                | <i>Pseudomonas extremorientalis</i>              |
|                               | N6L5         | ○                                       |                           | ○                           | ○                                | <i>Pseudomonas extremorientalis</i>              |
|                               | N6N1         |                                         |                           |                             | ○                                | <i>Pseudomonas gessardii</i>                     |
|                               | N6N5(KHRT2)  | ○                                       | ○                         | ○                           | ○                                | <i>Pseudomonas koreensis</i>                     |
|                               | N6Z1         | ○                                       | ○                         | ○                           | ○                                | <i>Pseudomonas koreensis</i>                     |
|                               | N6Z3         | ○                                       |                           | ○                           | ○                                | <i>Pseudomonas extremorientalis</i>              |
|                               | N7Ns4(KHRT5) | ○                                       | ○                         | ○                           | ○                                | <i>Pseudomonas protegens</i>                     |
| Aug. 2019 Uren Aich<br>JP     | N8L3         | ○                                       | ○                         |                             |                                  | <i>Pseudomonas parafulva</i>                     |
|                               | N9L1         | ○                                       | ○                         |                             |                                  | <i>Pseudomonas parafulva</i>                     |
|                               | N9L3         | ○                                       | ○                         |                             |                                  | <i>Pseudomonas extremorientalis</i>              |
|                               | N9N1         | ○                                       | ○                         |                             |                                  | <i>Pseudomonas baetica</i>                       |
|                               | N10N2        | ○                                       | ○                         |                             |                                  | <i>Pseudomonas parafulva</i>                     |
|                               | N9L1-15      | ○                                       | ○                         |                             | ○                                | <i>Pseudomonas koreensis</i>                     |
|                               | N10L2-15     | ○                                       | ○                         |                             |                                  | <i>Pseudomonas parafulva</i>                     |
|                               | N10N1-15     | ○                                       | ○                         |                             |                                  | <i>Pseudomonas parafulva</i>                     |
| Sep. 2019 Uren Aich<br>JP     | LT1          | n.d.                                    | ○                         |                             | ○                                | <i>Pseudomonas jessenii</i>                      |
|                               | LL1          | n.d.                                    | ○                         |                             | ○                                | <i>Pseudomonas koreensis</i>                     |
|                               | ST5          | n.d.                                    | ○                         |                             |                                  | <i>Lactococcus raffinolactis</i>                 |
|                               | ST2-15       | n.d.                                    | ○                         | ○                           | ○                                | <i>Lactococcus raffinolactis</i>                 |
|                               | LN1-15       | n.d.                                    |                           |                             | ○                                | <i>Pseudomonas koreensis</i>                     |
|                               | LT1-15       | n.d.                                    | ○                         |                             | ○                                | <i>Pseudomonas koreensis</i>                     |
| Oct. 2019 Uren Aich<br>JP     | Ox10N4-15    | n.d.                                    | ○                         |                             |                                  | <i>Chryseobacterium soldanellicola</i>           |
| Nov. 2019 Uren Aich<br>JP     | M11TS1       | n.d.                                    |                           | ○                           |                                  | <i>Pseudomonas koreensis</i>                     |
|                               | L11TS2       | n.d.                                    | ○                         |                             |                                  | <i>Yersinia ruckeri</i>                          |
|                               | S11NS1       | n.d.                                    | ○                         |                             | ○                                | <i>Pseudomonas fragi</i>                         |
|                               | M11ZS2       | n.d.                                    | ○                         |                             | ○                                | <i>Acinetobacter movanagherensis ?</i>           |
|                               | S11TS2       | n.d.                                    | ○                         |                             | ○                                | <i>Pseudomonas koreensis</i>                     |
|                               | M11TS2       | n.d.                                    | ○                         |                             | ○                                | <i>Yersinia ruckeri</i>                          |
| Sep. 2019 Uren<br>Aich JP     | L11TS1       | n.d.                                    | ○                         |                             | ○                                | <i>Yersinia ruckeri</i>                          |
|                               | M11N1        | n.d.                                    |                           | ○                           | ○                                | <i>Pseudomonas koreensis</i>                     |
|                               | M11Z3        | n.d.                                    |                           | ○                           |                                  | <i>Pseudomonas koreensis</i>                     |

|                        |             |      |   |   |   |                                     |
|------------------------|-------------|------|---|---|---|-------------------------------------|
| Dec. 2019 Uren Aich JP | M12T4       | n.d. | ○ | ○ | ○ | <i>Lactococcus chungangensis</i>    |
|                        | S12NS1      | n.d. | ○ |   | ○ | <i>Yersinia ruckeri</i>             |
|                        | S12NS2      | n.d. | ○ |   | ○ | n.d. <i>Pseudomonas</i> ?           |
|                        | S12NS3      | n.d. | ○ |   | ○ | n.d.                                |
| Jan. 2020 Uren Aich JP | L1T1        | n.d. | ○ |   | ○ | <i>Pseudomonas baetica</i>          |
| Mar. 2020 Uren Aich JP | N3-2        | ○    | ○ | ○ | ○ | <i>Pseudomonas baetica</i>          |
|                        | N3-5        | ○    | ○ | ○ | ○ | <i>Pseudomonas baetica</i>          |
|                        | N3-8        |      |   |   | ○ | <i>Pseudomonas baetica</i>          |
|                        | N3-9        | ○    |   |   | ○ | <i>Pseudomonas arsenicoxydans</i>   |
|                        | N3-11       | ○    | ○ | ○ | ○ | <i>Pseudomonas baetica</i>          |
|                        | L3-2        |      |   |   | ○ | <i>Pseudomonas koreensis</i>        |
|                        | C3-11       | ○    | ○ |   | ○ | <i>Pseudomonas extremorientalis</i> |
|                        | C3-6        |      |   |   | ○ | <i>Pseudomonas aylmerense</i>       |
|                        | Z3-4        | ○    | ○ |   | ○ | <i>Pseudomonas arsenicoxydans</i>   |
| Feb 2019 Ogaki Gifu JP | N1N1        | ○    | ○ | ○ | ○ | <i>Pseudomonas sp.</i>              |
| Feb 2019 Ogaki Gifu JP | N1Z3(KHRT3) | ○    | ○ |   | ○ | <i>Pseudomonas protegens</i>        |

○: Positive for antimicrobial activity (Clear zone = 1 cm >) n.d.; Not determined.

## Supplementary figures

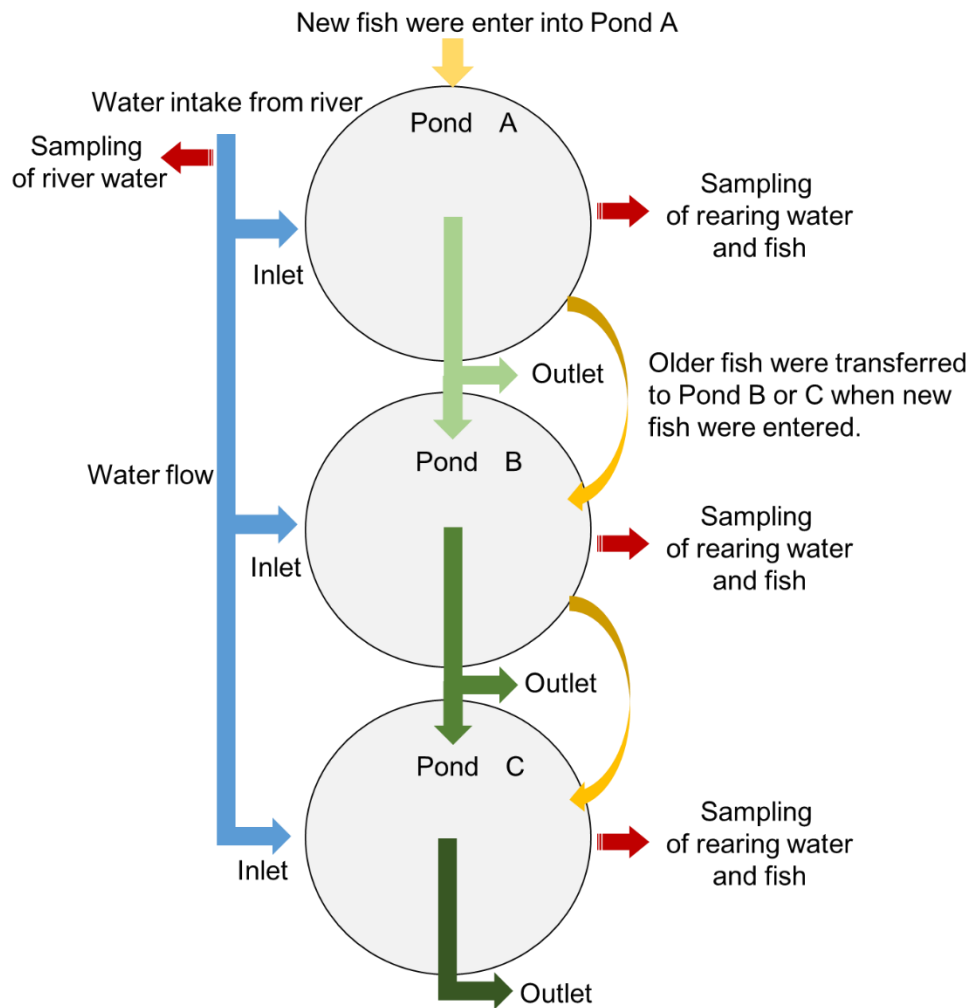

**Supplementary figure S1. Schematic figure of the structure of aquaculture ponds and water flow in the ponds.** Yellow arrows represent the movement of fish in the system and red arrows represent the sampling positions in the system.

A

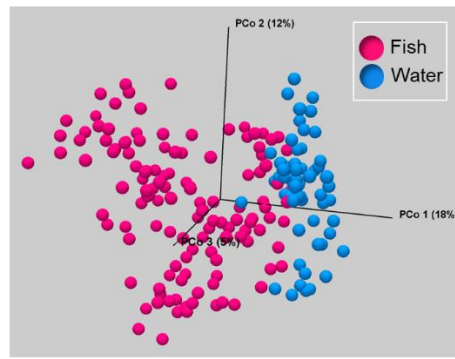

B

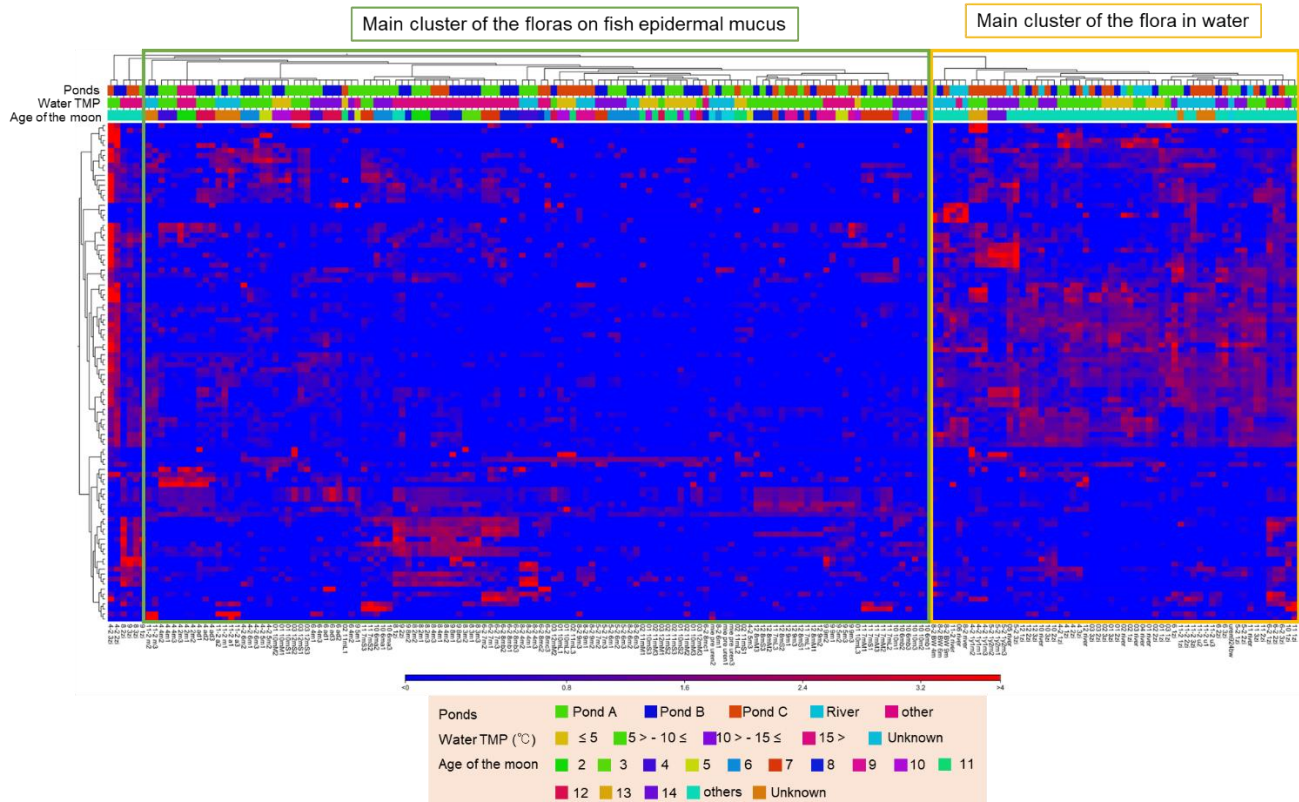

**Supplementary figure S2. Beta-diversity of the bacterial floras of rainbow trout skin mucus and water and classification of the bacterial floras by clustered heatmap analysis.** (A) The  $\beta$ -diversity using unweighted Unifrac distance was calculated using all the data from the year 2019 and 2020. Data are visualized in a 3D-PCoA plot. (B) The composition of the bacterial flora from mucus samples and rearing water samples was classified based on relative abundance of the top-100 OTUs shown in a clustered heatmap. The green frame represents main clusters formed by the mucus samples, and the yellow frame represents main clusters formed by the water samples. Sampling conditions (aquaculture ponds, water temperature deviation, and age of the moon) are represented by bars with different colors, as defined in the legend.

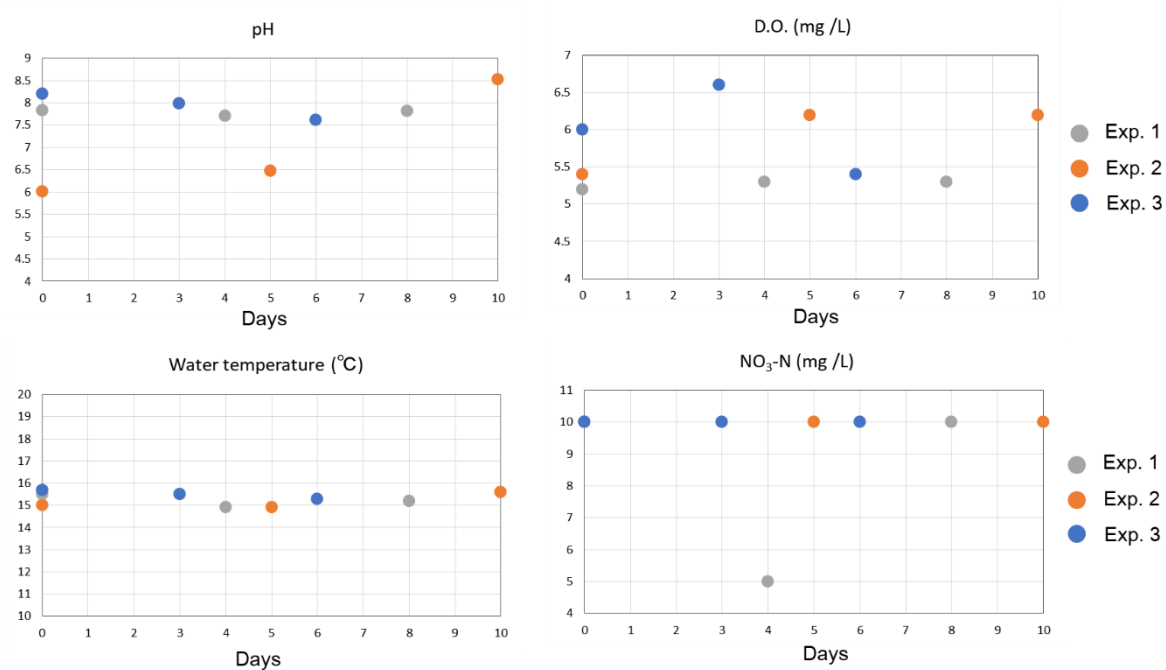

**Supplementary figure S3. The changes of the water quality parameters in lab aquarium during the experiments.** The pH, dissolved oxygen (D.O.), waterer temperature, and nitrate nitrogen (NO<sub>3</sub>-N) were measured at several time points during the experiments.

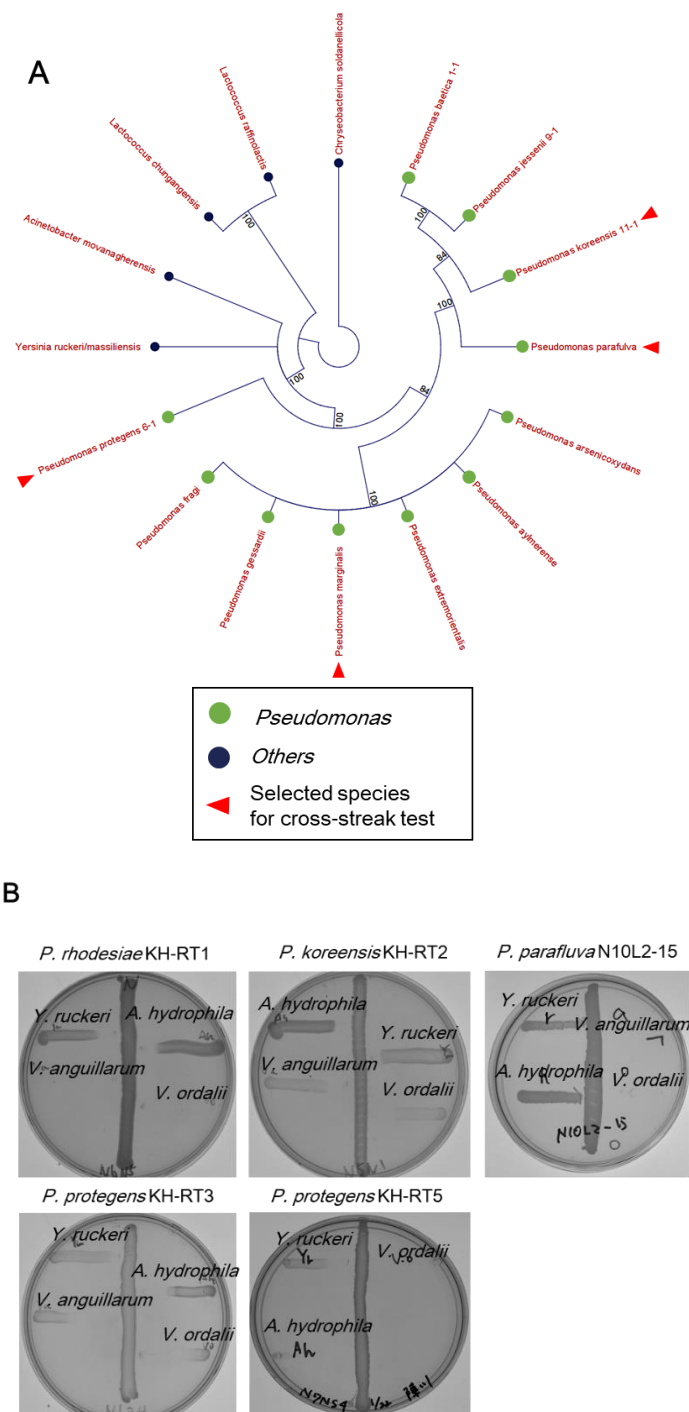

**Supplementary figure S4. The phylogenetic analyses the antimicrobial substances-producing bacteria and confirmation of its antimicrobial activity.** (A) The phylogenetic analysis was performed with the representative sequence of the 16s rDNA v1-v2 region of antimicrobial substances-producing bacteria. The phylogenetic tree was created by the maximum likely-hood method. The bootstrap values were shown at each branch. (B) The antimicrobial activity of some isolated *Pseudomonas* was confirmed by the cross-streak method.

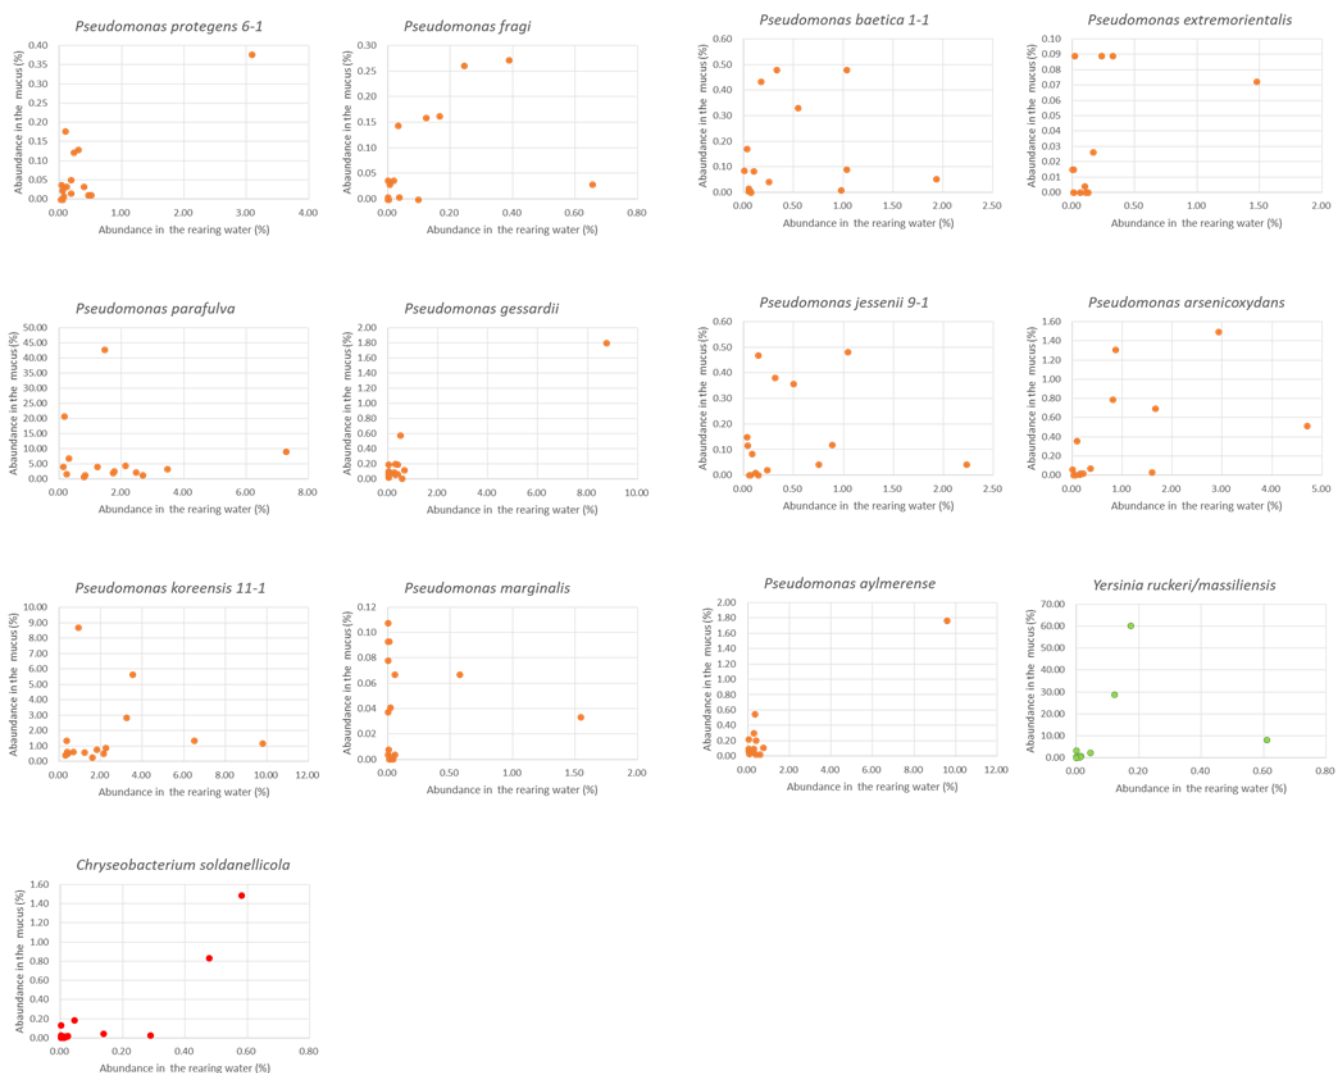

**Supplementary figure S5. Correlation diagrams for the abundance of antimicrobial bacteria in the flow-through aquaculture.** Correlation between the abundance of the antimicrobial bacteria on the epidermal mucus and that in the rearing water shown in Figure 5 was analyzed. Note that *Lactococcus* and *Acinetobacter* was not analyzed because they were not detected on the mucus or in the rearing water.
